# Supplementary material
Source: Elsevier journal article supplement (https://www.sciencedirect.com/science/article/pii/S0213911119300779)
Supplement: mmc1 [file S0213911119300779:mmc1.pdf]

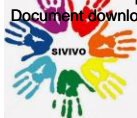

# CUESTIONARIO DE DETECCIÓN DE VIOLENCIA DE ODIO

CÓDIGO DE ENCUESTADOR: \_\_\_\_\_ Nº DE CUESTIONARIO \_\_\_\_\_ FECHA ENTREVISTA / \_\_\_\_ / \_\_\_\_ / \_\_\_\_

1 Nos gustaría que colaborara en un estudio que estamos realizando para valorar la frecuencia con la que ocurre la violencia de odio, es decir, aquella que sucede cuando una persona agrede a otra por razones como la raza, orientación sexual, religión, estilo de vida, nacionalidad u otras. Para ello le pedimos que responda a este cuestionario. La participación es voluntaria y su decisión de contestar o no, no va a tener ninguna consecuencia sobre su tratamiento en este servicio.

5 La información que se recoja pasará a una base de datos **COMPLETAMENTE ANÓNIMA**, en la que será imposible identificar sus respuestas, para mantener la CONFIDENCIALIDAD de las mismas. Si hay alguna pregunta que le moleste, no tiene que responderla, sin tener que dar ningún tipo de explicaciones.

8 Agradecemos de antemano su colaboración.

10 Centro: \_\_\_\_\_ Servicio: \_\_\_\_\_ Número de Historia: / \_\_\_\_\_ /

## 1. DATOS SOCIODEMOGRÁFICOS

P1. Fecha de nacimiento: / \_\_\_\_ / \_\_\_\_ / \_\_\_\_ /

P2. Sexo:

Hombre..... ☐ . Mujer..... ☐

Otro, especifique \_\_\_\_\_

P3. Si no puede realizar la entrevista señale el motivo:

Abuso sustancias..... ☐ . Agresividad..... ☐

Idioma..... ☐ . Bajo nivel de consciencia..... ☐

Violencia de pareja..... ☐ . Ataque de pánico..... ☐

Otro..... ☐

P4. Actualmente se identifica como:

Hombre..... ☐ . Mujer..... ☐

Hombre trans..... ☐ . Mujer trans..... ☐

Otra, especifique \_\_\_\_\_

P5. Lugar de origen: \_\_\_\_\_

P6. Nacionalidad: \_\_\_\_\_

P7. En caso de origen extranjero, ¿En qué año llegó a España? / \_\_\_\_ /

P8. Nivel de estudios:

No sabe leer ni escribir..... ☐

Estudios primarios (completos o no) o sin estudios..... ☐

Bachiller/graduado escolar/ESO/FP grado medio..... ☐

FP grado superior/estudios superiores (universitarios o no)..... ☐

No sabe leer/ni contesta..... ☐

Otros que no se encuadren en los anteriores,

Especifique \_\_\_\_\_

P9. ¿Desea usted participar en este estudio?:

Sí..... ☐

No..... ☐ FINAL DE ENTREVISTA

## 2. PROCESO ASISTENCIAL

P10. Etapa del proceso asistencial:

Ingreso primario..... ☐ . Derivado de AP..... ☐

Reingreso..... ☐

P11. Paciente acude:

Propios medios..... ☐ . Policía..... ☐

Ambulancia/UVI móvil..... ☐ . Otros..... ☐

P12. Paciente acude:

Solo..... ☐

Acompañado por \_\_\_\_\_

P13. Paciente con discapacidad física:

No..... ☐ . No sabe..... ☐

Sí..... ☐ especificar \_\_\_\_\_

P14. Paciente con discapacidad psíquica/mental:

No..... ☐ . No sabe..... ☐

Sí..... ☐ especificar \_\_\_\_\_

P15. Paciente con consumo de alcohol:

Sí, + por paciente..... ☐ . No..... ☐

Sí, hay sospecha..... ☐ . Desconocido..... ☐

P16. Paciente con consumo de otras sustancias:

Sí, + por paciente o analítica... ☐ No..... ☐

Sí, hay sospecha..... ☐ Desconocido..... ☐

P17. Lesión por:

Pelea..... ☐ . Abuso sexual/violación..... ☐

Ahogamiento..... ☐ . Sustancia corrosiva/cáustica... ☐

Envenenamiento... ☐ . Ahorcamiento/estrangulación... ☐

Arma de fuego... ☐ . Objeto cortante/punzante..... ☐

Otro, especifique \_\_\_\_\_

P18. Diagnóstico:

Fractura/luxación..... ☐

Esguince/torcedura..... ☐

Lesión intracraneal..... ☐

Lesión interna (tórax, abdomen y/o pelvis)..... ☐

Herida abierta..... ☐

Lesión de vasos sanguíneos..... ☐

Lesión superficial..... ☐

Contusión..... ☐

Aplastamiento..... ☐

Cuerpo extraño en orificio natural..... ☐

Quemaduras..... ☐

Lesión nerviosa o de médula espinal..... ☐

Envenenamiento (drogas/fármacos/sust. biológicas)... ☐

Intoxicación (no medicamentosa)..... ☐

Otro, especifique \_\_\_\_\_

P19. Localización de la lesión:

Cabeza y cuello..... ☐ . Tórax..... ☐

Abdomen..... ☐ . Miembro superior... ☐

Genitales..... ☐ . Miembro inferior... ☐

P20. Pronóstico:

Leve..... ☐ . Moderado..... ☐

Grave..... ☐ . Reservado..... ☐

P21. Resolución del caso:

Alta..... ☐ . Alta voluntaria..... ☐

Observación..... ☐ . Ingreso..... ☐

Traslado..... ☐ . Éxito..... ☐

P22. Paciente se deriva a:

Centro de salud..... ☐ . Consultas externas... ☐

Servicios sociales.... ☐ . Otros..... ☐

**3. DESCRIPCIÓN DEL INCIDENTE****P23. Fecha y hora del incidente:**

/ / :

**P24. Lugar del incidente (puede marcar varias):**

- ☐ Hogar..... ☐ Trabajo o in itinere.....  
☐ Bar/restaurante..... ☐ Discoteca/Pub.....  
☐ Recinto deportivo... ☐ Centro educativo.....  
☐ Calle..... ☐ Transporte.....  
☐ En mi barrio..... ☐ Otro.....

**P24b. Indique la calle o vía donde sucedió:****P25. Breve descripción del incidente:****P26. Número de personas agresoras: / /**No sabe..... ☐**P27. Sexo de la/s persona/s agresora/s:**

- ☐ Mujer/es..... ☐ Hombre/s.....  
☐ Grupo mixto..... ☐ No sabe.....

**P28. ¿Conoce a la persona que le agredió?:**

- ☐ No.....  
☐ Sí, especifique su relación.....

**P29. ¿Podría decir la edad aproximada de la persona agresora?:**

- ☐ 18..... ☐ 18-35..... ☐ 36-50.....  
☐ 51-65..... ☐ >65.....

**P30. Cuando le agredieron, estaba usted:**

- ☐ Solo/a.....  
☐ Acompañado/a... ☐ ¿por quién?.....

**P31. ¿Cuál cree usted que ha sido el motivo, total o parcial, de la agresión? (sea el motivo real o no):**

- ☐ Su sexo (*mujer u hombre*) ☐ Sí ☐ No ☐ NS  
 Especificar: .....  
☐ Su origen étnico o racial ☐ Sí ☐ No ☐ NS  
 Especificar: .....  
☐ Su nacionalidad ☐ Sí ☐ No ☐ NS  
 Especificar: .....  
☐ Su orientación sexual (*lesbiana, gay, etc*) ☐ Sí ☐ No ☐ NS  
 Especificar: .....  
☐ Su edad (actual) ☐ Sí ☐ No ☐ NS  
 Especificar: .....  
☐ Sus creencias religiosas (o no creencias) ☐ Sí ☐ No ☐ NS  
 Especificar: .....  
☐ Su identidad de género ☐ Sí ☐ No ☐ NS  
 (*trans, masculina, femenina*)  
 Especificar: .....  
☐ Su aspecto físico (**IMPORTANTE ESPECIFICAR**) ☐ Sí ☐ No ☐ NS  
 Especificar: .....  
☐ Por estar en situación de pobreza ☐ Sí ☐ No ☐ NS  
 Especificar: .....  
☐ Tener una discapacidad física o psíquica ☐ Sí ☐ No ☐ NS  
 Especificar: .....  
☐ Tener una enf. crónica o infecciosa ☐ Sí ☐ No ☐ NS  
 Especificar: .....  
☐ Sus ideas políticas ☐ Sí ☐ No ☐ NS  
 Especificar: .....  
☐ Cualquier otro motivo ☐ Sí ☐ No ☐ NS  
 (*prostitución, filiación deportiva, cultura, idioma, origen territorial*)  
 Especificar: .....

**P32. ¿Utilizó el/la agresor/a un lenguaje abusivo, insultos o comentarios negativos o despectivos, de carácter intolerante o de rechazo?:**

- ☐ No.....  
☐ Sí..... Ejemplos: .....

**P33. ¿Había algún símbolo que pudiera indicar una razón particular para la agresión? (tatuajes, esvásticas, cabeza rapada, ropa militar, uniforme):**

- ☐ Sí..... ☐ No sabe.....  
☐ No.....

**P34. ¿Ha sufrido agresiones por este motivo anteriormente?:**

- ☐ Nunca..... ☐ 6 a 10 veces.....  
☐ Una vez..... ☐ Más de 10 veces....  
☐ 2 a 5 veces..... ☐ Desconocido.....

**P35. ¿Ha denunciado el incidente a la policía o al juzgado o tiene intención de hacerlo?:**

- ☐ No sabe.....  
☐ Ha denunciado.....  
☐ No ha denunciado, pero sí lo hará.....  
☐ No ha denunciado y no lo hará..... ☐ En este caso, ¿Por qué?.....

**4. IMPRESIÓN DEL PERSONAL SANITARIO****P36. ¿Cree usted que el/la paciente ha sido víctima de violencia de odio?**

- ☐ Sí.....  
☐ No.....

**P37. ¿Qué característica, real o percibida, cree usted que motivó la agresión?****Observaciones que desee hacer:****AUTORIZACIÓN ESTUDIO CUALITATIVO**

Se va a proceder a realizar entrevistas en profundidad (entre media y una hora) a algunas de las personas participantes en este estudio, para completarlo:

¿Querría usted participar en esa nueva fase del estudio?

NO ☐

SÍ ☐ En este caso, y para poder establecer contactar con usted y establecer una cita, podría facilitarnos:

Nombre de pila (puede ser ficticio).....

Teléfono.....

Día y hora de preferencia.....

Por favor, firma este consentimiento:

**POR FAVOR, NO OLVIDE AGRADECER AL/A LA PACIENTE SU COLABORACIÓN EN EL ESTUDIO.**
